# Supplementary material for: Therapeutic Vaccine for Genital Herpes Simplex Virus-2 Infection: Findings From a Randomized Trial
Source: PubMed Central journal article supplement — J Infect Dis. 2017 Jan 30;215(6):856–64. doi: 10.1093/infdis/jix004 (PMC7206854; doi:10.1093/infdis/jix004), 2017-01-30
Supplement: jix004_suppl_supplementary_table_s1.pdf [file jix004_suppl_supplementary_table_s1.pdf]

## Supplementary Table S1

Table S1 Genital HSV-2 shedding and lesions rates using a Poisson regression method.

|                                                                                    | Placebo<br>N=28      | Antigen only<br>N=28 | GEN-003,<br>10 µg<br>N=31 | GEN-003,<br>30 µg<br>N=29 | GEN-003,<br>100 µg<br>N=27 |
|------------------------------------------------------------------------------------|----------------------|----------------------|---------------------------|---------------------------|----------------------------|
| Characteristic                                                                     |                      |                      |                           |                           |                            |
| Rate Ratio for HSV shedding relative to pre-immunization (95% confidence interval) |                      |                      |                           |                           |                            |
| First period<br>post-immunization                                                  | 0.95<br>(0.57, 1.59) | 1.29<br>(0.51, 3.27) | 1.06<br>(0.57, 1.97)      | 0.47<br>(0.25, 0.85)*     | 0.68<br>(0.40, 1.14)       |
| At 6 months                                                                        | 1.31<br>(0.78, 2.19) | 1.61<br>(0.81, 3.17) | 1.58<br>(0.94, 2.67)      | 0.55<br>(0.30, 1.03)      | 0.89<br>(0.57, 1.39)       |
| Rate Ratio for lesions relative to pre-immunization (95% confidence interval)      |                      |                      |                           |                           |                            |
| First period<br>post-immunization                                                  | 1.19<br>(0.55, 2.61) | 0.64<br>(0.37, 1.13) | 0.69<br>(0.33, 1.43)      | 0.53<br>(0.24, 1.16)      | 0.52<br>(0.23, 1.14)       |
| At 6 months                                                                        | 1.38<br>(0.71, 2.71) | 0.88<br>(0.43, 1.82) | 0.89<br>(0.37, 2.14)      | 0.32<br>(0.15, 0.70)*     | 0.84<br>(0.39, 1.85)       |

\*p&lt;0.01

HSV, herpes simplex virus
